# Supplementary material
Source: Research Square preprint supplement (doi:10.21203/rs.3.rs-9721442/v1)
Supplement: Supplementary file 1 [file a480370993dc50272fb9625d.pdf]

## Supplementary Material

# A de Sitter region at every black-hole core: discrete causal-set evidence and a canonical regular continuum metric

David Alfyorov

[davidich.alfyorov@gmail.com](mailto:davidich.alfyorov@gmail.com)

2026 May 14

### 1 Canonical numerical inputs

The model fixes the de Sitter core scale to the inverse of the spin-2 fakeon-pole mass and uses no other free parameter beyond the ADM mass  $M$  and the nonlocality cutoff  $\Lambda$ . The headline numerical constants of the canonical sector are collected in Table 1.

Table 1: Canonical inputs of the regular black-hole construction. All quantities are independent rationals or zeros of the canonical entire form factor; none is fit to data.

| Symbol                    | Definition                                | Value                                                         |
|---------------------------|-------------------------------------------|---------------------------------------------------------------|
| $z_1$                     | first positive real zero of $\Pi_{TT}(z)$ | 2.41483889...                                                 |
| $m_{2,\text{pole}}$       | spin-2 fakeon-pole mass                   | $\Lambda\sqrt{z_1} \approx 1.5540\Lambda$                     |
| $\ell_{\text{can}}$       | canonical de Sitter core scale            | $1/m_{2,\text{pole}}$                                         |
| $(M\Lambda)_{\text{min}}$ | minimal horizon mass threshold            | 0.83641...                                                    |
| $\mathcal{K}(0)$          | Kretschmann scalar at the centre          | $96 M^2/\ell_{\text{can}}^6$                                  |
| $r_{\text{SEC}}$          | SEC-violation radius (inner core)         | $2^{-1/3} \ell_{\text{can}} \approx 0.7937 \ell_{\text{can}}$ |
| $\beta_{\text{PPN}}$      | post-Newtonian $\beta$                    | 1 (exact)                                                     |
| $\gamma_{\text{PPN}}$     | post-Newtonian $\gamma$                   | 1 (exact)                                                     |
| $\delta a_{1/r^4}$        | lapse-correction leading order            | $\mathcal{O}(1/r^4)$                                          |

### 2 Sprinkling protocol for the empirical closure

The fundamental causal-set demonstration uses a finite- $N$  Poisson sprinkling of the Schwarzschild interior region truncated at radial distance  $\varepsilon_r$  from the central singularity. The protocol parameters that underlie the headline scaling  $\text{deg}_{\text{max}} \sim N^{1.04 \pm 0.02}$  and the bounded curvature proxy saturating at  $\approx 8.4$  are listed in Table 2.

### 3 Figure-regeneration script

The script `make_figures.py` bundled with this supplement regenerates each of the six paper figures from the canonical data and the closed-form continuum expressions. Invocation from the directory containing the script:

```
pythonmake_figures.py
```

The script writes `fig1_overview.pdf` through `fig6_eps_deep.pdf` into the current working directory at publication-quality resolution. Each figure is independent and can be regenerated separately by uncommenting the corresponding block at the bottom of the script. Required packages: `numpy`, `matplotlib`, and `scipy` (for the Brent root used to locate  $z_1$ ).

Table 2: Sprinkling protocol parameters used in the discrete-level closure. All cells contribute to the fit reported in the main text.

| Parameter                    | Range / value                                    | Notes                            |
|------------------------------|--------------------------------------------------|----------------------------------|
| Background                   | Schwarzschild                                    | $M = 1$ in geometric units       |
| Inner cutoff $\varepsilon_r$ | $10^{-2} M$                                      | deep-IR truncation               |
| Outer cutoff                 | $2M$                                             | inside event horizon             |
| $N$ -grid                    | $\{10^4, 3 \cdot 10^4, 10^5, 3 \cdot 10^5\}$     | log-spaced                       |
| Seeds per $N$                | 5                                                | independent Poisson realisations |
| Causal predicate             | metric light-cone                                | evaluated exactly                |
| Curvature proxy              | $\text{deg}_{\max} / \langle \text{deg} \rangle$ | local-degree ratio               |
| Reference family             | Hayward effective metric                         | saturates at $\approx 3.3$       |

#### 4 Provenance of the canonical zero $z_1$

The first positive real zero  $z_1 = 2.41483889 \dots$  of the canonical transverse–traceless form factor  $\Pi_{TT}(z)$  is the load-bearing numerical input of the construction. Its location was determined by a bracketed Brent root finder applied to a high-precision (`mpmath` `dps`  $\geq 50$ ) implementation of the entire form factor; the value was independently cross-checked against the same zero recorded in the project canonical-validator module, with agreement to  $1.3 \times 10^{-12}$ . The same constant controls the spin-2 fakeon-pole mass  $m_{2,\text{pole}} = \Lambda\sqrt{z_1}$  and, through it, the de Sitter core scale  $\ell_{\text{can}} = 1/m_{2,\text{pole}}$ , the minimal horizon mass threshold  $(M\Lambda)_{\text{min}} = 0.836$ , and the Ori e-folding rate  $\kappa_- \rightarrow m_{2,\text{pole}}$  at large  $M\Lambda$ .

#### 5 Limitations carried into the supplement

The reproducibility material covers the figure pipeline and the canonical numerical constants in full. It does *not* provide a first-principles discrete computation of inner-horizon dynamics, a nonlinear-perturbative proof of stability, or extensions to rotating or charged backgrounds; each of these is explicitly listed as an open question in the main manuscript and remains so in the supplement.
